# Supplementary material
Source: Elsevier journal article supplement (https://www.sciencedirect.com/science/article/pii/S0210570518303145)
Supplement: mmc1 [file S0210570518303145:mmc1.doc]

**Anexo 1**. Riesgo de CCR y neoplasia colorrectal avanzada tras la resección de adenomas

| **Año** | **Título** | **Revista** | **Primer autor** | **Diseño del estudio** | **Objetivo primario** | **Sujetos** | **Variable** | **Eventos** | **Resultados** |
| --- | --- | --- | --- | --- | --- | --- | --- | --- | --- |
| **2004** | *“Incidence and recurrence rates of colorectal adenomas estimated by annually repeated colonoscopies on asymptomatic Japanese”* | Gut | Yamaji Y,  et al.38 | Observacional retrospectivo | **Incidencia y recurrencia de neoplasias colorrectales** | Pacientes con cribado colorrectal entre 1988 y 2002 | **Lesiones avanzadas**: carcinoma *in situ*, displasia alto grado, o adenomas 10mm | Total pacientes: 6225   - Sin neoplasia: 4084 pacientes - Adenomas <10mm: 1818 - Lesiones avanzadas: 323   **Neoplasia colorectal:**   - Sin neoplasia: 7.2%/año. Mediana 2.89 años - Adenomas <10mm: 19.3%/año. Mediana 2.34 años - Lesiones avanzadas: 22.9%/año. Mediana 2.19 años   **Lesiones avanzadas:**   - Sin neoplasia: 0.21%/año. Mediana 3.45 años - Adenomas <10mm: 0.64%/año. Mediana 3.46 años - Lesiones avanzadas: 1.88%/año. Mediana 3.29 años | **Neoplasia colorectal:**   - Adenomas <10mm: OR 2.4 (IC95% 2.2-2.7); *p*<0.001 - Lesiones avanzadas: OR 2.6 (IC95% 2.2-3.1); *p*<0.001   **Lesiones avanzadas:**   - Adenomas <10mm: OR 2.6 (IC95% 1.6-4.2); *p*<0.001 - Lesiones avanzadas: OR 6.6 (IC95% 3.7-12); *p*<0.001 |
| **2006** | *“Incidence of advanced adenomas at surveillance colonoscopy in patients with a personal history of colon adenomas: a meta-analysis and systematic review”* | Gastro-intest  Endosc | Saini SD,  et al.16 | Revisión sistemática  y  metanálisis de 4 estudios | **Incidencia de adenomas avanzados a los 3 años.** | - Bajo riesgo: 1-2 adenomas < 1cm - Alto riesgo: 3 adenomas o adenomas avanzados   en la colonoscopia basal | Adenomas y adenomas avanzados | Total paciente: 3254   - Seguimiento 3 años (3 estudios) y 4 años (1 estudio) - **Riesgo de recidiva de adenomas**: 3 adenomas en la colonoscopia basal frente a 1-2 adenomas: RR 2.52 (IC95% 1.07-5.97) - **Riesgo de recidiva de adenomas avanzados**: Pacientes con adenomas con displasia de alto grado en la colonoscopia basal: RR 1.84 (IC95%1.06-3.19) | |

| **Año** | **Título** | **Revista** | **Primer autor** | **Diseño del estudio** | **Objetivo primario** | **Sujetos** | **Variable** | **Eventos** | **Resultados** |
| --- | --- | --- | --- | --- | --- | --- | --- | --- | --- |
| **2007** | *“Five-year colon surveillance after screening colonoscopy”* | Gastro-enterology | Lieberman DA, et al.9 | Observacional prospectivo | **Incidencia de neoplasia avanzada metacrona a los 5 años.** | Total pacientes en programa cribado:  3121 | **Neoplasia avanzada**:  1cm o displasia alto grado o componente velloso o CCR | - 1171 con neoplasia en colonoscopia basal  seguimiento 895 (76.4%) - 501 sin neoplasia en colonoscopia basal  seguimiento 298 (59.5%) | **Sin neoplasia**: 2.4% neoplasia avanzada  **Con neoplasia:**   - 1-2 adenomas tubulares <10mm: OR 1.92 (IC95% 0.83-4.42) - 3-4 adenomas tubulares <10mm: OR 5.01 (IC95% 2.10-11.96) - 10mm: OR 6.40 (IC95% 2.74-14.94) - Velloso: OR 6.05 (IC95% 2.48-14.71) - DAG: OR 6.87 (IC95% 2.61-18.07) |
| **2010** | *“Colonoscopy surveillance after polypectomy may be extended beyond five years”* | J Clin Gastro-enterol | Miller HL, et al.34 | Observacional retrospectivo | **Incidencia de neoplasia avanzada metacrona a más de 5 años** | Pacientes con o sin adenomas en la colonoscopia basal a los cuales se les realizó la vigilancia a los 5-10 años de la colonoscopia basal. | **Adenomas avanzados**:  1cm o displasia alto grado o componente velloso | Total pacientes: 399   - 116 pacientes (29.1%) presentaron adenomas en el seguimiento - 25 pacientes (6%) con adenomas avanzados en el seguimiento | Riesgo de adenomas avanzados a los 5 años frente a 6-10 años:   - **Sin adenomas avanzados en colonoscopia basal:**   5% frente al 6.2% (*p*=0.39)   - **Colonoscopia basal negativa:**   7% frente al 3.6% (*p*=0.15)   - **Adenomas avanzados en colonoscopia basal:**   26% a los 5 años |
| **2011** | *“Five-year risk for advanced colorectal neoplasia after initial colonoscopy according to the baseline risk stratification: a prospective study in 2452 asymptomatic Koreans”* | Gut | Chung SJ, et al.36 | Observacional retrospectivo | **Incidencia de neoplasia avanzada metacrona** | **3 grupos:**   - Normal: sin adenomas en colonoscopia basal - Bajo riesgo: 1-2 adenomas <10mm - Alto riesgo: adenomas avanzados o 3 adenomas | **Adenomas avanzados**:  1cm o displasia alto grado o componente velloso  Tasa acumulada de adenomas avanzados a los 5 años | Total pacientes: 3803   - 2452 pacientes con seguimiento - Normal: 1242 pacientes - Bajo riesgo: 671 - Alto riesgo: 539 - Normal: 2% - Bajo riesgo: 2.4% - Alto riesgo: recidiva del 4.6%, 7.4% y 9.6% a 1, 2 y 3 años | Bajo riesgo frente a normal:  HR 1.14 (IC95% 0.61-2.17) |

| **Año** | **Título** | **Revista** | **Primer autor** | **Diseño del estudio** | **Objetivo primario** | **Sujetos** | **Variable** | **Eventos** | **Resultados** |
| --- | --- | --- | --- | --- | --- | --- | --- | --- | --- |
| **2014** | *“Systematic review with meta-analysis: the incidence of advanced neoplasia after polypectomy in patients with and without low-risk adenomas”* | Aliment Pharmacol Ther | Hassan C, et al.37 | Revisión sistemática con metaanálisis:  7 estudios  *(3 retrospectivos y*  *4 prospectivos)* | **Incidencia de neoplasia avanzada metacrona** | - Experimental: 1-2 adenomas no avanzados - Control: pacientes sin adenomas | **Neoplasia avanzada**:  1cm o displasia alto grado o componente velloso o CCR | Total pacientes: 11387   - Experimental: 3.6% (148/4079) - Control: 1.6% (119/7308) | - OR 1.83 (1.31-2.56) - I2: 37% - Media seguimiento: 2-5 años |
| **2017** | *“Risk stratification of individuals with low-risk colorectal adenomas using clinical characteristics: a pooled analysis”* | Gut | Gupta S, et al.20 | Observacional prospectivo | **Riesgo de neoplasia avanzada metacrona (neoplasia avanzada) en función de las caracterís-ticas basales** | 1-2 adenomas no avanzados <1cm   - Guías EU/EEUU: 1-2 AT  1cm sin DAG o sin componente velloso | **Neoplasia avanzada**:  1cm o displasia alto grado o componente velloso o CCR | - Guías EU/EEUU: 7.6% (188/2477) - Media seguimiento: 3-5 años | Edad:   - 50-69: ORa 2.99 (1.29- 6.95) - 70: ORa 4.08 (1.71-9.76)   Hª previa de pólipos:   - ORa 2.25 (1.61-3.15)   Localización distal y proximal:   - ORa: 1.98 (1.04-3.79) |
| **2016** | *“Incidence of advanced neoplasia during surveillance in high and intermediate-risk groups of the European colorectal cancer screening guidelines”* | Endos-copy | Cubiella J, et al.45 | Observacional retrospectivo | **Incidencia de neoplasia avanzada y de CCR** | - Riesgo medio: 3-4 adenomas o al menos 1 adenoma 10-19mm, velloso o con DAG - Alto riesgo: 5 adenomas o adenomas 20mm | **Neoplasia avanzada**:  1cm o displasia alto grado o componente velloso  **CCR** | Total pacientes: 862   - Riesgo medio: 429 - Alto riesgo: 433   **Neoplasia avanzada:** 487   - Riesgo alto: 16% - Riesgo medio: 12.3%   **CCR**: 19   - Riesgo alto: 0.5% - Riesgo medio: 0.4% | - **Neoplasia avanzada**: HR 1.5 (1.2-1.8) - **CCR**: HR 1.6 (0.6-3.8) |

| **Año** | **Título** | **Revista** | **Primer autor** | **Diseño del estudio** | **Objetivo primario** | **Sujetos** | **Variable** | **Eventos** | **Resultados** |
| --- | --- | --- | --- | --- | --- | --- | --- | --- | --- |
| **1992** | *“Long-term risk of colorectal cancer after excision of rectosigmoid adenomas”* | N Engl J Med | Atkin WS, et al.31 | Observacional prospectivo | **Riesgo de CCR** **tras polipectomía** | Pacientes con adenomas en recto-sigma | **SIR**    *Se calcula dividiendo los CCR observados entre los CCR esperados* | Total pacientes: 1618   - SIR: 1.2 (IC95% 0.7-2.1) | - Bajo riesgo: 0.5 (IC95% 0.1-1.3) - Alto riesgo: 3.6 (IC95% 2.4-5.0) |
| **2012** | *“Long-term risk of colorectal cancer after adenoma removal: a population-based cohort study”* | Gut | Cottet V, et al.7 | Observacional prospectivo | **Riesgo de CCR** **tras polipectomía** | Pacientes con adenomas colorrectales entre 1990 y 1999 | **SIR**  *Se calcula dividiendo los CCR observados entre los CCR esperados* | Total pacientes: 5779   - CCR diagnosticados: 87 - CCR esperados: 69 - SIR: 1.26 (IC95% 1.01-1.56) | **Riesgo CCR**:   - Bajo riesgo: SIR 0.68 (IC95% 0.44-0.99) - Alto riesgo: SIR 2.23 (IC95% 1.67-2.92)   **Riesgo de adenomas avanzados**:   - Pacientes sin seguimiento endoscópico: SIR 4.26 (IC95% 2.89-6.04) - Pacientes con seguimiento endoscópico: SIR 1.10 (IC95% 0.62-1.82) |
| **2014** | *“Long-term colorectal-cancer mortality after adenoma removal”* | N Engl J Med | LØberg M, et al.32 | Observacional prospectivo | **Mortalidad por CCR** | - Bajo riesgo: 1-2 adenomas no avanzados - Alto riesgo: >2 adenomas o DAG o componente velloso | **SMR**  *Se calcula dividiendo las muertes observadas entre las muertes esperadas* | Total pacientes: 40826  Mediana seguimiento: 7.7 años   - CCR diagnosticados: 1273 - Muertes observadas: 383 - Muertes esperadas: 398 - SMR: 0.96 (IC95% 0.87-1.06) | **Bajo riesgo**:   - muertes observadas: 141 - muertes esperadas: 189 - SMR 0.75 (IC95% 0.63-0.88)   **Alto riesgo**:   - muertes observadas: 242 - muertes esperadas: 209 - SMR 1.16 (IC95% 1.02-1.31) |

*CCR: cáncer colorrectal; DAG: displasia de alto grado; SIR: tasa de incidencia estandarizada; SMR: tasa de mortalidad estandarizada.*
